# Supplementary material for: The sensitivity of transcriptomics BMD modeling to the methods used for microarray data normalization
Source: bioRxiv or medRxiv preprint supplement (doi:10.1101/781567), 2019-09-25
Supplement: Supplementary file [file media-1.pdf]

## Supplemental online file

### The sensitivity of transcriptomics BMD modeling to the methods used for microarray data normalization

Mezencev R. and Auerbach S.

#### 1. Supplemental methods

##### 1.1 Transcriptomic BMD modeling parameters:

- Pre-filter: Williams' trend test; p-value cutoff: 0.05; Filter out control genes (probes starting AFFX...); Use Fold Change Filter 1.50

- Benchmark Dose Analyses: Continuous models Hill (v. 2.18), Power (v. 2.19), Linear, Poly 2 (v. 2.21), Exp2, Exp3, Exp4, Exp5 (v. 1.11); Restrict Power  $\geq 1$ ; Confidence Level=0.95; Constant Variance; Maximum iterations=250; BMR=1 SD

- Best Model Selection: Lowest AIC; Flag Hill model with  $k < 1/3$  of Lowest Positive Dose and if this model is best, select next best model with  $p > 0.05$

##### 1.2 Functional classifications parameters:

Gene Ontology Analyses: GO Categories: Biological process (or Select Pathway: REACTOME)

Remove BMD > highest dose from category descriptive statistics

Remove BMD with p-value < 0.1

Remove Genes with BMDU/BMDL > 40

Eliminate Gene Set Redundancy

Identify Conflicting Probesets: correlation cutoff: 0.5

Most sensitive pathway was identified as pathway with lowest median BMD value when

contained at least 3 genes that passed probe-level BMD filtering and when the proportion of these genes in the pathway reached at least 5%.

## 2. Supplemental tables

Supplemental Table 1 Comparison of methods used for hybridization of the raw Affymetrix Rat Genome 230 2.0 Array data in this study

|              | Background estimation                                                                                                                                                                                                                            | Normalization                                                                             | Summarization                                                                                                                                                                                                                | Other                                                                                             |
|--------------|--------------------------------------------------------------------------------------------------------------------------------------------------------------------------------------------------------------------------------------------------|-------------------------------------------------------------------------------------------|------------------------------------------------------------------------------------------------------------------------------------------------------------------------------------------------------------------------------|---------------------------------------------------------------------------------------------------|
| GCRMA        | Model of PM and MM signals that include sequence-dependent non-specific binding and optical noise for each probe pair.                                                                                                                           | Quantile normalization                                                                    | Robust multiarray linear model fit using Median Polish                                                                                                                                                                       | -Employs MM intensities to correct background<br><br>-Results on log2 scale                       |
| RMA          | Convolution model of the observed PM probe signal as a sum of signal and background. Multiplicative error. Single global background used to adjust all intensities.                                                                              | Quantile normalization                                                                    | Robust multiarray linear model fit using Median Polish                                                                                                                                                                       | -Does not use MM intensities<br><br>-Results on log2 scale                                        |
| MAS 5.0      | Weighted average of lowest 2% of signals from 16 equal rectangular regions. Weighting reflects distance of 16 averages from a particular probe. PM signals adjusted by MM intensities to correct for non-specific binding. Multiplicative error. | Linear scaling using the trimmed mean that excludes the highest and lowest 2% of the data | Robust single-array method using one step Tukey biweight of background corrected intensities                                                                                                                                 | -Employs MM intensities<br><br>-Results on linear scale                                           |
| MAS 5.0_noA  | As in MAS 5.0                                                                                                                                                                                                                                    | As in MAS 5.0                                                                             | As in MAS 5.0                                                                                                                                                                                                                | -Probes with only "Absent" calls across all specimens are removed<br><br>-Results on linear scale |
| PLIER*       | PM-MM method. Mixed error model.                                                                                                                                                                                                                 | Quantile normalization                                                                    | Multiplicative model fitted to the PM-MM values, with array and probe as effects. An M-estimator is used that assess goodness of fit by the residuals generated from a generalized log transformation based on the PM and MM | -Employs PM and MM intensities.<br><br>-Results on linear scale                                   |
| PLIER16*     | As in PLIER                                                                                                                                                                                                                                      | As in PLIER                                                                               | As in PLIER                                                                                                                                                                                                                  | -As in PLIER<br>-16 is added to normalized signal intensities                                     |
| PLIER16_noA* | As in PLIER16                                                                                                                                                                                                                                    | As in PLIER16                                                                             | As in PLIER16                                                                                                                                                                                                                | -As in PLIER16<br><br>-Probes with only "Absent" calls across all specimens are removed           |

\* Relates to PLIER as specifically implemented in this study

Supplemental table 2 Median lowest BMD (BEPOD) and BMDL (BEPOD/L) values [mg/kg-day] determined by toxicogenomic BMD modeling for different normalization methods and different gene sets

| Collection of gene sets | GCRMA  | RMA    | MAS 5.0 | MAS5.0_<br>_noA calls | PLIER  | PLIER16 | Plier16_<br>_no A calls |
|-------------------------|--------|--------|---------|-----------------------|--------|---------|-------------------------|
| <b>Crude MCMH</b>       |        |        |         |                       |        |         |                         |
| <u>GO:BP</u><br>BMD     | 79.34  | 69.48  | 62.67   | 62.67                 | 61.69  | 61.69   | 61.69                   |
| BMDL                    | 49.80  | 43.77  | 41.86   | 41.86                 | 41.36  | 41.36   | 41.36                   |
| <u>Reactome</u><br>BMD  | 79.36  | 81.32  | 71.88   | 71.86                 | 79.21  | 70.21   | 79.21                   |
| BMDL                    | 49.80  | 50.42  | 47.15   | 47.15                 | 49.59  | 49.59   | 49.59                   |
| <b>MCMH</b>             |        |        |         |                       |        |         |                         |
| <u>GO:BP</u><br>BMD     | 69.45  | 79.21  | 58.84   | 58.84                 | 95.95  | 95.95   | 95.95                   |
| BMDL                    | 46.21  | 49.59  | 40.76   | 40.76                 | 65.58  | 65.58   | 65.58                   |
| <u>Reactome</u><br>BMD  | 223.52 | 284.71 | 174.02  | 174.02                | 271.37 | 264.09  | 264.09                  |
| BMDL                    | 155.45 | 186.10 | 118.79  | 118.79                | 172.32 | 172.40  | 172.40                  |
| <b>p-toluidine</b>      |        |        |         |                       |        |         |                         |
| <u>GO:BP</u><br>BMD     | 2.88   | 3.00   | 0.33    | 0.33                  | 2.82   | 5.29    | 5.29                    |
| BMDL                    | 1.12   | 1.12   | 0.07    | 0.07                  | 1.01   | 2.13    | 2.13                    |
| <u>Reactome</u><br>BMD  | 5.32   | 8.09   | 3.33    | 5.83                  | 2.85   | 15.77   | 15.77                   |
| BMDL                    | 1.73   | 4.89   | 0.66    | 2.52                  | 0.98   | 10.99   | 10.99                   |
| <b>DMPT - liver</b>     |        |        |         |                       |        |         |                         |
| <u>GO:BP</u><br>BMD     | 1.47   | 1.72   | 1.04    | 1.04                  | 1.02   | 1.36    | 1.36                    |
| BMDL                    | 0.50   | 0.96   | 0.34    | 0.34                  | 0.30   | 0.42    | 0.42                    |
| <u>Reactome</u><br>BMD  | 3.44   | 4.24   | 2.62    | 2.62                  | 2.43   | 5.17    | 6.62                    |
| BMDL                    | 1.79   | 2.05   | 1.10    | 1.10                  | 0.94   | 1.59    | 3.04                    |
| <b>PPH-kidney</b>       |        |        |         |                       |        |         |                         |
| <u>GO:BP</u><br>BMD     | 22.65  | 53.35  | 63.40   | 63.40                 | 118.53 | 176.02  | 176.02                  |
| BMDL                    | 4.20   | 16.40  | 11.26   | 11.26                 | 75.35  | 120.34  | 120.34                  |
| <u>Reactome</u><br>BMD  | 54.51  | 183.97 | 243.13  | 243.13                | 201.67 | 180.81  | 180.81                  |
| BMDL                    | 8.58   | 120.87 | 104.12  | 152.92                | 116.43 | 120.34  | 120.34                  |

Supplemental table 3: GO:BP ontologies and Reactome Pathways with lowest median BMD or BMDL

| Accession code | Name                                                                                                     |
|----------------|----------------------------------------------------------------------------------------------------------|
| GO:0002933     | Lipid hydroxylation                                                                                      |
| GO:0006084     | Acetyl-CoA metabolic process                                                                             |
| GO:0006090     | Pyruvate metabolic process                                                                               |
| GO:0007040     | Lysosome organization                                                                                    |
| GO:0007062     | Sister chromatid cohesion                                                                                |
| GO:0009108     | Coenzyme biosynthetic process                                                                            |
| GO:0032026     | Response to magnesium ion                                                                                |
| GO:0034502     | Protein localization to chromosome                                                                       |
| GO:0035384     | Thioester biosynthetic process                                                                           |
| GO:0042130     | Negative regulation of T cell proliferation                                                              |
| GO:0043588     | Skin development                                                                                         |
| GO:0043651     | Linoleic acid metabolic process                                                                          |
| GO:0044246     | Regulation of multicellular organismal metabolic process                                                 |
| GO:0048266     | Behavioral response to pain                                                                              |
| GO:0051445     | Regulation of meiotic cell cycle                                                                         |
| GO:0061051     | Positive regulation of cell growth involved in cardiac muscle cell development                           |
| GO:0070141     | Response to UV-A                                                                                         |
| GO:0070206     | Protein trimerization                                                                                    |
| GO:0070207     | Protein homotrimerization                                                                                |
| GO:0070988     | Demethylation                                                                                            |
| GO:0070989     | Oxidative demethylation                                                                                  |
| GO:0071616     | Acyl-CoA biosynthetic process                                                                            |
| GO:0080171     | Lytic vacuole organization                                                                               |
| GO:0090207     | Regulation of triglyceride metabolic process                                                             |
| GO:1902229     | Regulation of intrinsic apoptotic signaling pathway in response to DNA damage                            |
| GO:1904705     | Regulation of vascular smooth muscle cell proliferation                                                  |
| GO:2000727     | Positive regulation of cardiac muscle cell differentiation                                               |
| R-RNO-1296072  | Voltage gated Potassium channels                                                                         |
| R-RNO-141424   | Amplification of signal from the kinetochores                                                            |
| R-RNO-141444   | Amplification of signal from unattached kinetochores via a MAD2 inhibitory signal                        |
| R-RNO-1483206  | Glycerophospholipid biosynthesis                                                                         |
| R-RNO-156580   | Phase II - Conjugation of compounds                                                                      |
| R-RNO-159418   | Recycling of bile acids and salts                                                                        |
| R-RNO-163125   | Post-translational modification: synthesis of GPI-anchored proteins                                      |
| R-RNO-163685   | Integration of energy metabolism                                                                         |
| R-RNO-1638091  | Heparan sulfate/heparin (HS-GAG) metabolism                                                              |
| R-RNO-174154   | APC/C:Cdc20 mediated degradation of Securin                                                              |
| R-RNO-174154   | APC/C:Cdc20 mediated degradation of Securin                                                              |
| R-RNO-174178   | APC/C:Cdh1 mediated degradation of Cdc20 and other APC/C:Cdh1 targeted proteins in late mitosis/early G1 |
| R-RNO-174184   | Cdc20:Phospho-APC/C mediated degradation of Cyclin A                                                     |
| R-RNO-176417   | Phosphorylation of Emi1                                                                                  |
| R-RNO-179419   | APC:Cdc20 mediated degradation of cell cycle proteins prior to satisfaction of the cell cycle checkpoint |
| R-RNO-2024096  | HS-GAG degradation                                                                                       |
| R-RNO-2187338  | Visual phototransduction                                                                                 |
| R-RNO-382556   | ABC-family proteins mediated transport                                                                   |
| R-RNO-5173105  | O-linked glycosylation                                                                                   |
| R-RNO-5663220  | RHO GTPases Activate Formins                                                                             |
| R-RNO-69618    | Mitotic Spindle Checkpoint                                                                               |

| Accession code | Name                                    |
|----------------|-----------------------------------------|
| R-RNO-75105    | Fatty acyl-CoA biosynthesis             |
| R-RNO-75105    | Fatty acyl-CoA biosynthesis             |
| R-RNO-77289    | Mitochondrial Fatty Acid Beta-Oxidation |
| R-RNO-8878166  | Transcriptional regulation by RUNX2     |
| R-RNO-8978868  | Fatty acid metabolism                   |

### 3. Supplemental figures

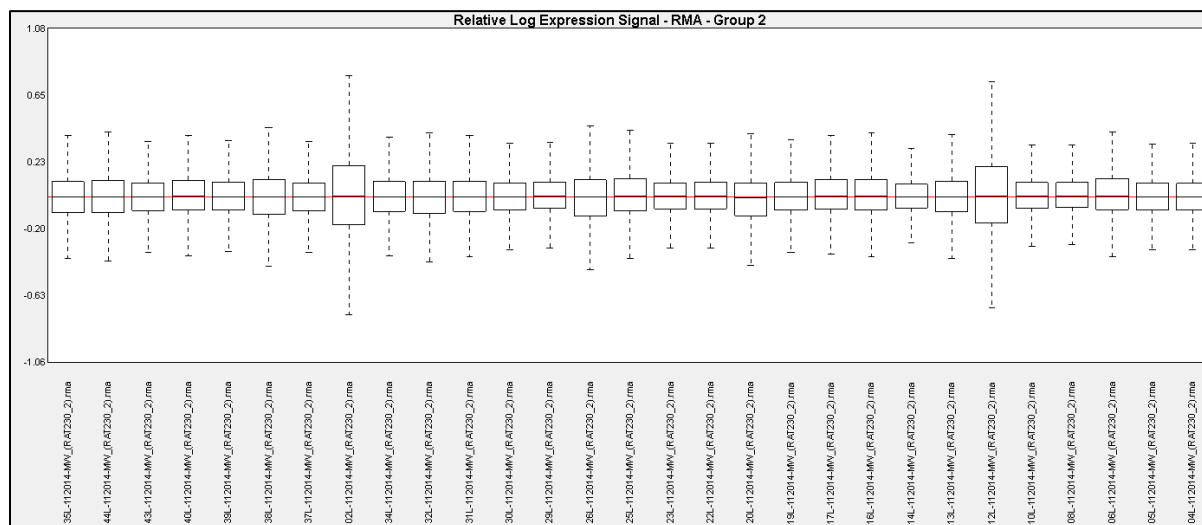

Supplemental figure 1 RLE boxplots of expression data for crude MCHM normalized by RMA before removing low-quality chips 102L and 112 L.

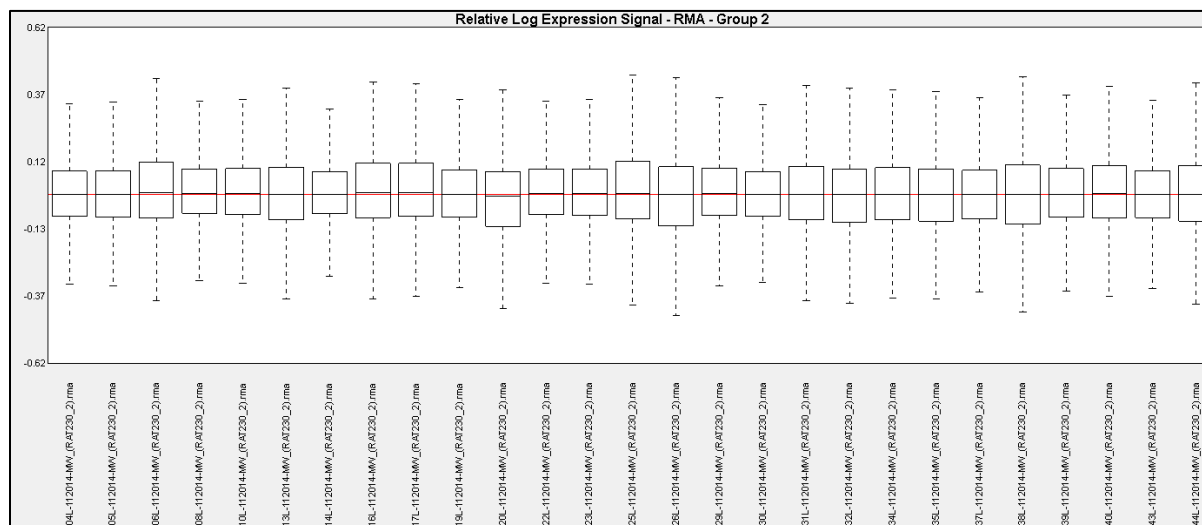

Supplemental figure 2 RLE boxplots of expression data for crude MCHM normalized by RMA after removing low-quality chips 102L and 112 L.

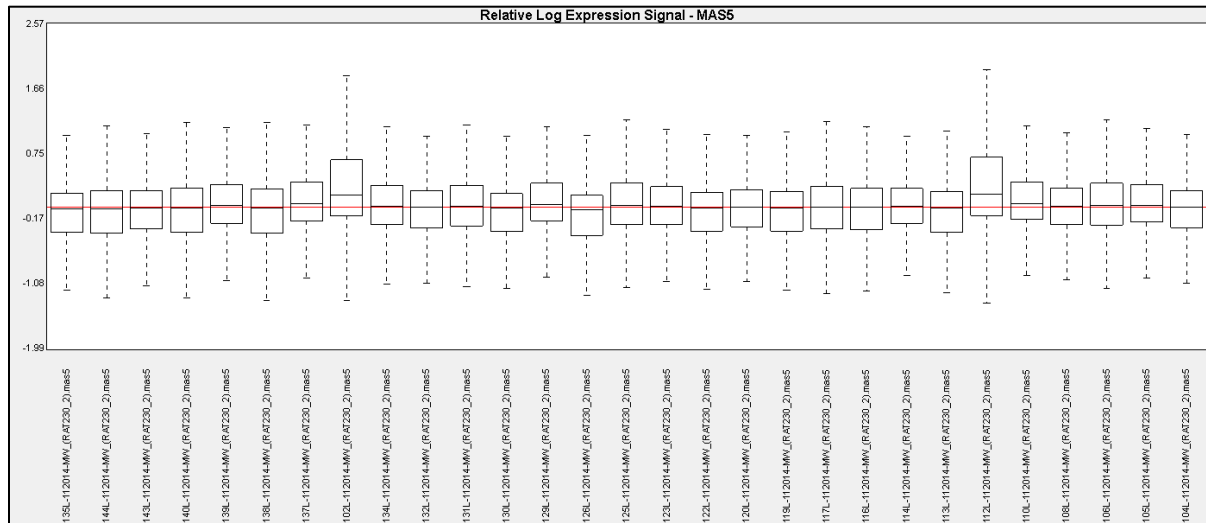

Supplemental figure 3 RLE boxplots of expression data for crude MCHM normalized by MAS 5.0 method before removing low-quality chips 102L and 112 L.

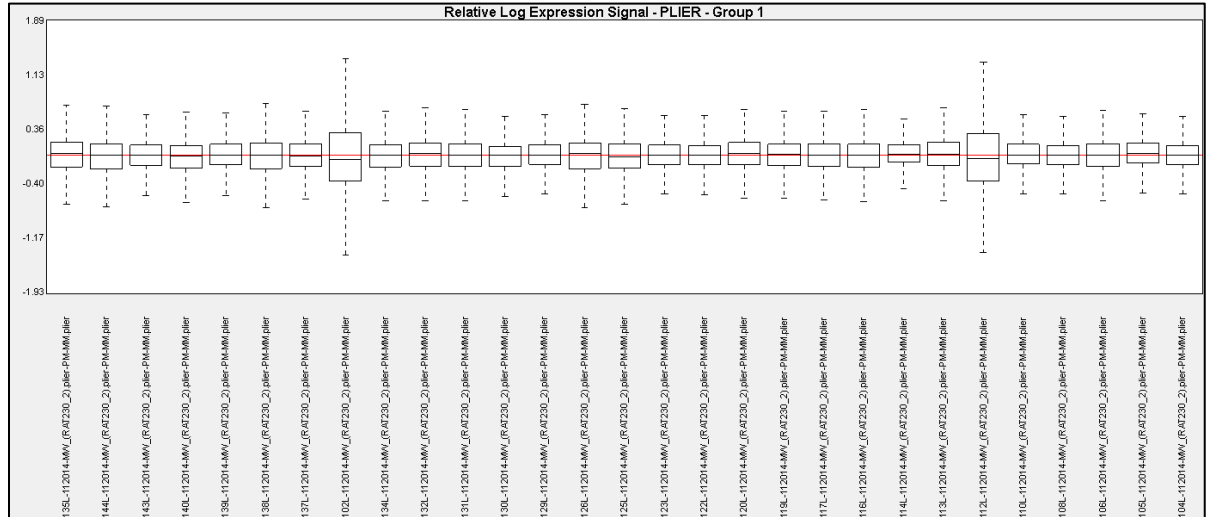

Supplemental figure 4 RLE boxplots of expression data for crude MCHM normalized by PLIER before removing low-quality chips 102L and 112 L.

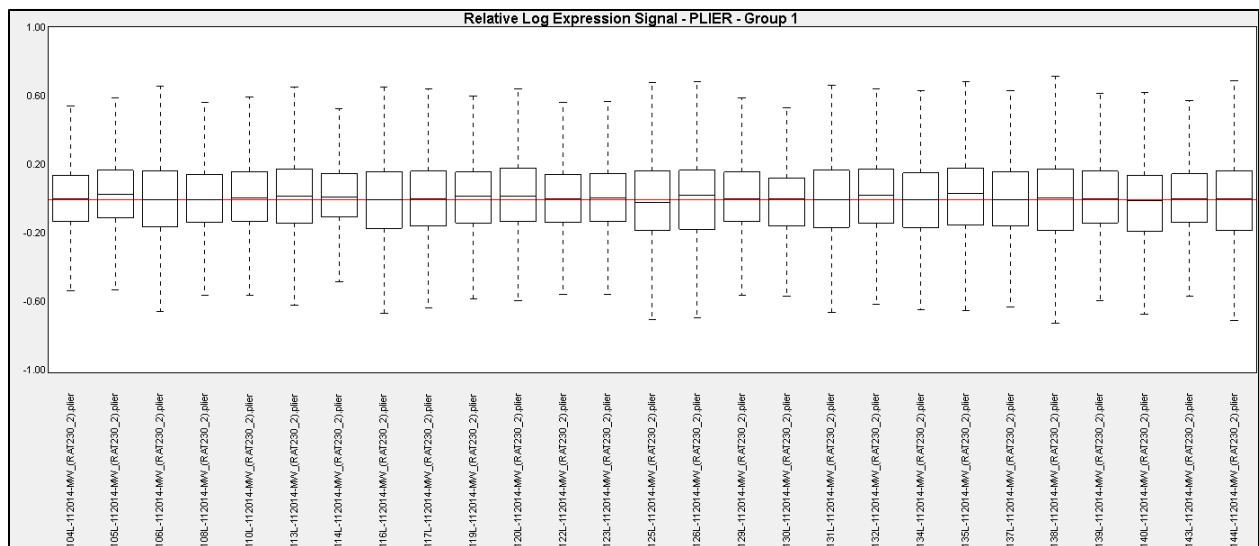

Supplemental figure 5 RLE boxplots of expression data for crude MCHM normalized by PLIER after removing low-quality chips 102L and 112 L.

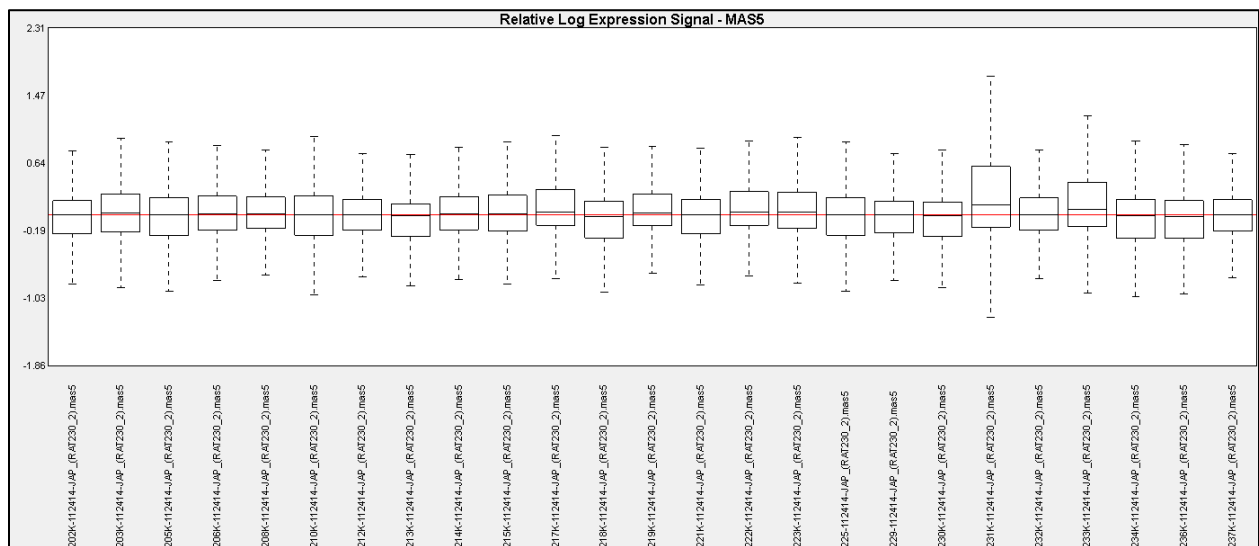

Supplemental figure 6 RLE boxplots of expression data for PPH normalized by MAS 5.0 before removing low-quality chip 231K.

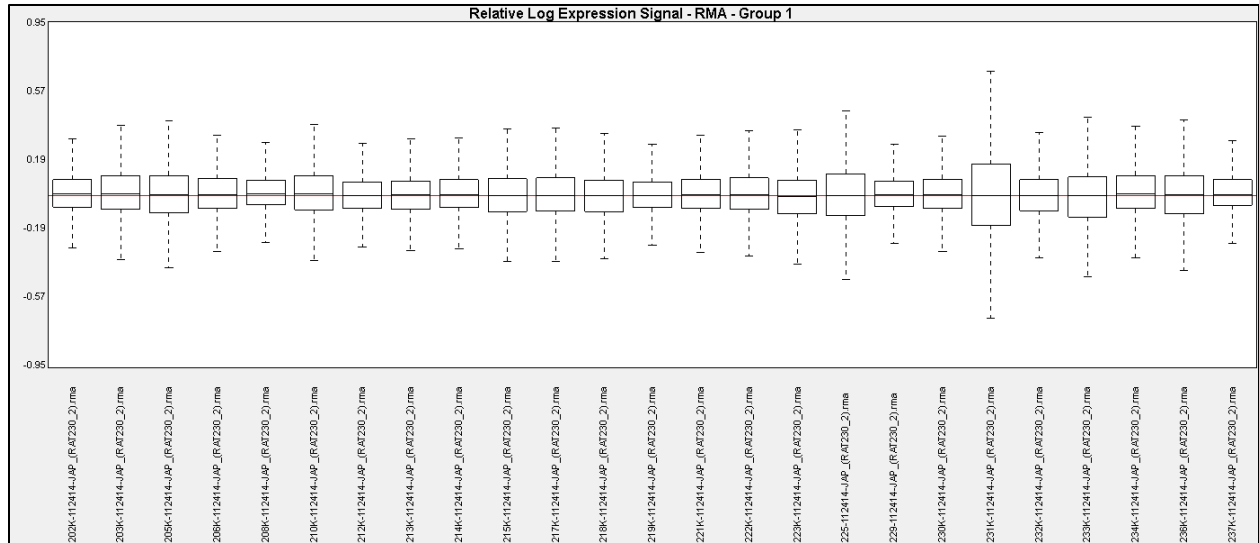

Supplemental figure 7 RLE boxplots of expression data for PPH normalized by RMA before removing low-quality chip 231K.

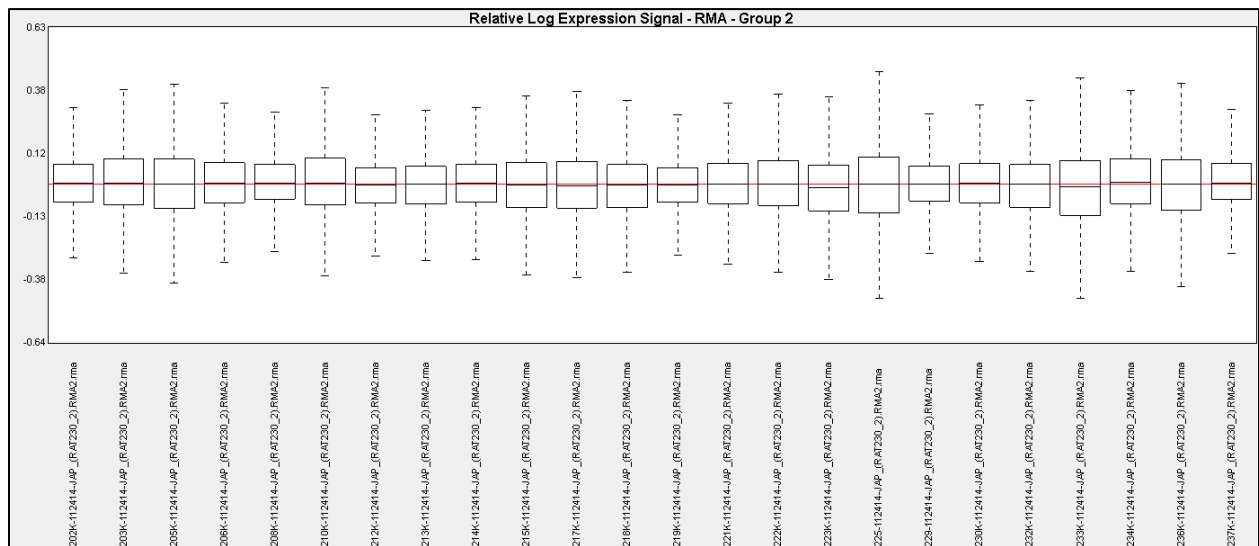

Supplemental figure 8 RLE boxplots of expression data for PPH normalized by RMA after removing low-quality chip 231K.



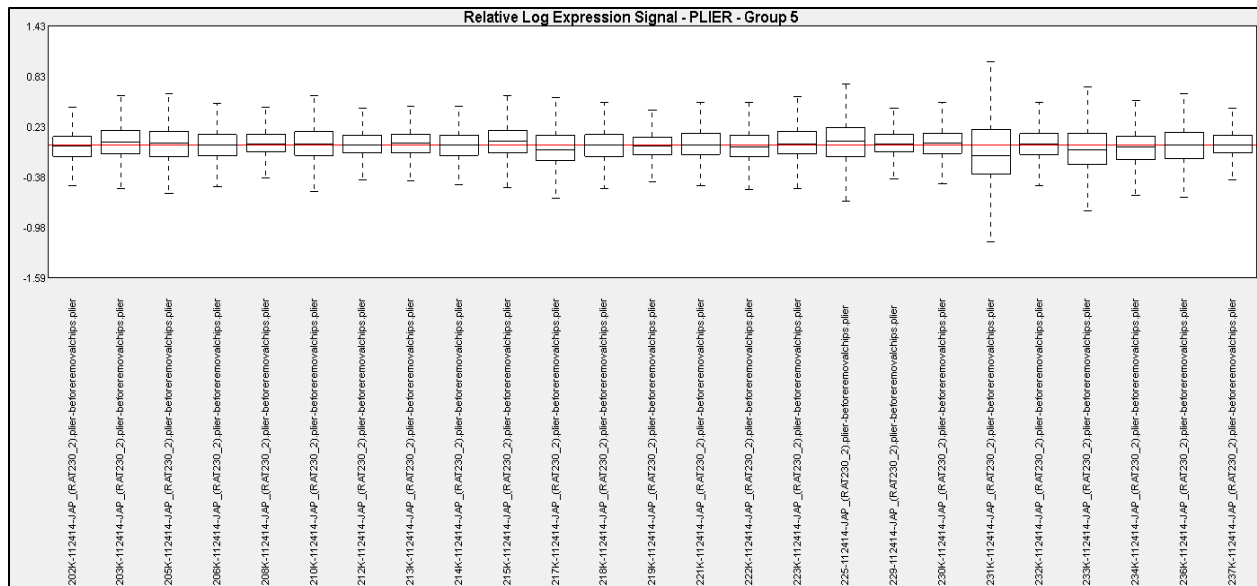

Supplemental figure 9 RLE boxplots of expression data for PPH normalized by PLIER before removing low-quality chips 217K, 225K, 231K and 233K.

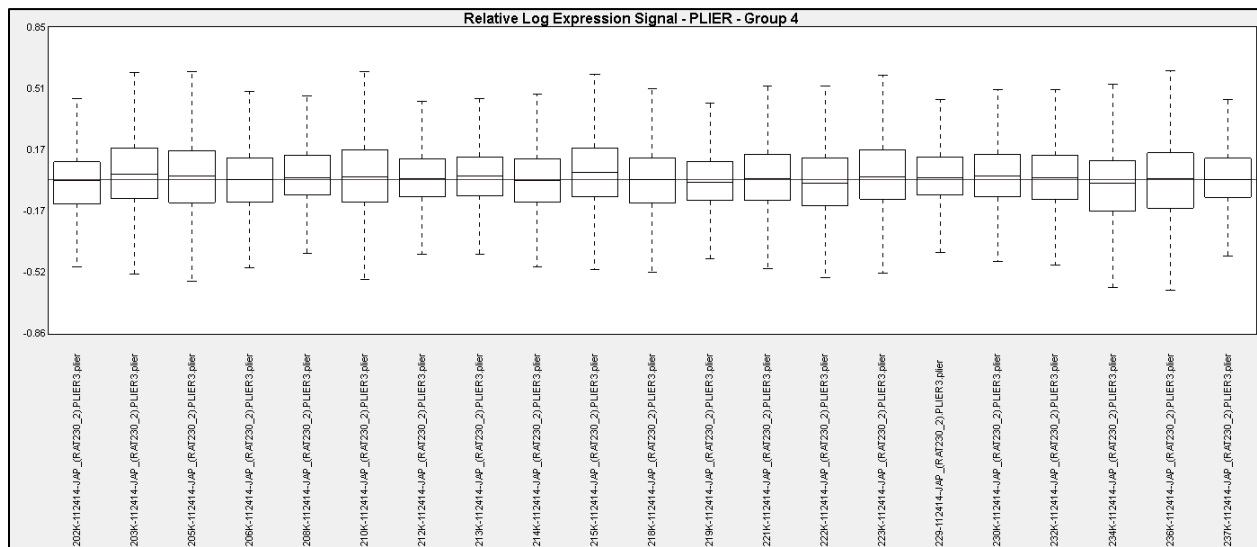

Supplemental figure 10 RLE boxplots of expression data for PPH normalized by PLIER after removing low-quality chips 217K, 225K, 231K and 233K.

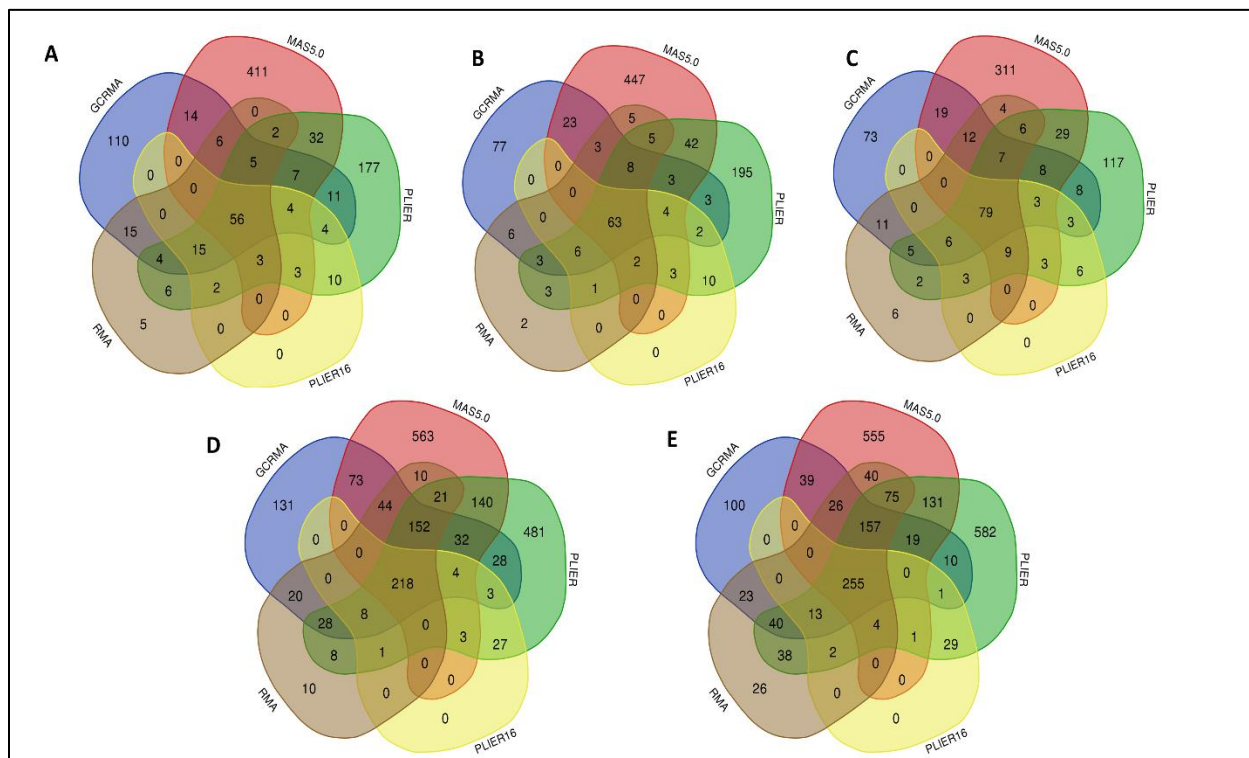

Supplemental figure 11 Numbers of differentially expressed genes identified for chemical-treatment pairs by different normalization methods depicted by Venn diagrams. A – crude MCHM/liver; B- neat MCHM/liver; C – PPH/kidney; D – DMPT/liver; E – p-toluidine/liver. Only GCRMA, RMA, MAS5.0, PLIER and PLIER16 are shown to enable visualization (normalization methods MAS5.0\_noA and PLIER16\_noA identify subsets of DEG found by MAS5.0 and PLIER16, respectively).

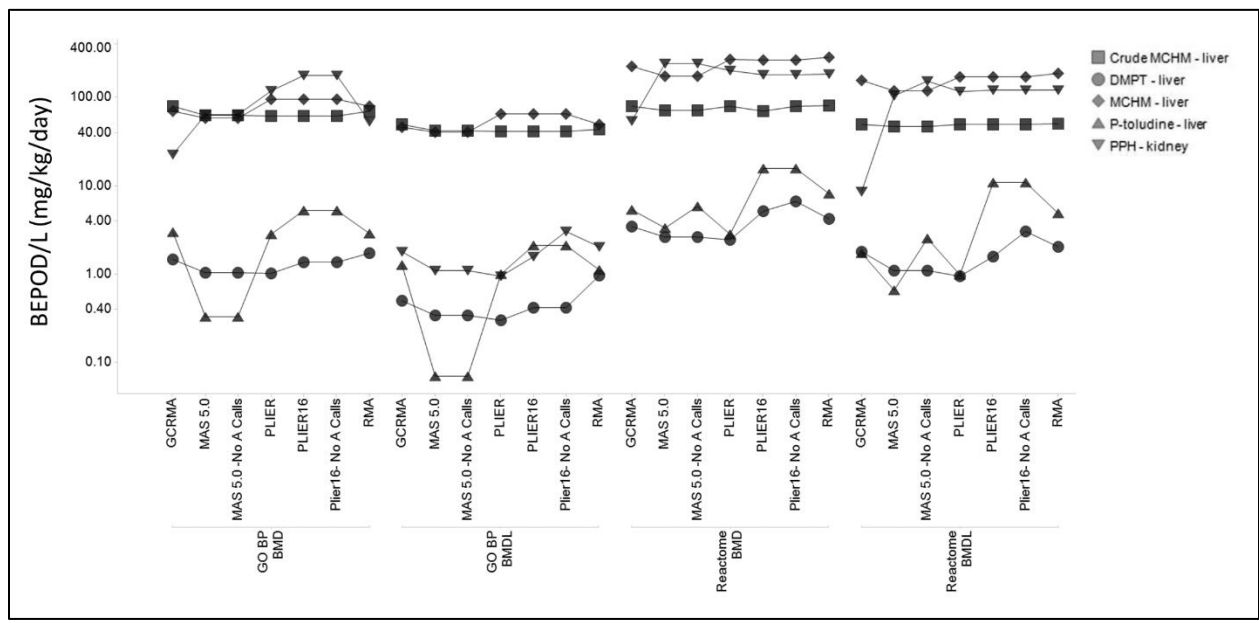

Supplemental figure 12 Lowest median BMD (BEPOD) and BMDL (BEPOD/L) values for different gene sets (GO:BP or Reactome) and normalizations (GCRMA, MAS5.0, MAS5.0\_noA calls, PLIER, PLIER16, PLIER16\_noA calls and RMA).
